# Supplementary material for: A Dual-Successive-Screen Model at Pollen/Stigma and Pollen Tube/Ovary Explaining Paradoxical Self-Incompatibility Diagnosis in the Olive Tree—An Interpretative Update of the Literature
Source: Plants (Basel). 2021 Sep 17;10(9):1938. doi: 10.3390/plants10091938 (PMC8466169; doi:10.3390/plants10091938)
Supplement: Supplementary file 1 [file plants-10-01938-s001.zip › plants-1341687-supplementary.pdf]

**Table S1.** S-allele pairs leading to practical disturbances in orchards through the dual-successive-screen model: DSI and PASI.

| <b>A</b><br><b>Stigma</b><br><b>phenotype</b><br><b>G1</b> | <b>B</b><br><b>Pollen</b><br><b>phenotype</b><br><b>G2</b> | <b>C</b><br><b>Stigma</b><br><b>phenotype</b><br><b>G2</b> | <b>D</b><br><b>Pollen</b><br><b>phenotype</b><br><b>G1</b> | <b>Fruit due to</b><br><b>self-</b><br><b>fecundation</b><br><b>in the field</b> | <b>Fruit due to self-</b><br><b>fecundation</b><br><b>in a bag</b> | <b>Fruit due to crosses</b> |
|------------------------------------------------------------|------------------------------------------------------------|------------------------------------------------------------|------------------------------------------------------------|----------------------------------------------------------------------------------|--------------------------------------------------------------------|-----------------------------|
| [R1R2]                                                     | <u>R1</u>                                                  | [R1R4]                                                     | <u>R2</u>                                                  | AB none; CD none                                                                 | AB none; CD none                                                   | none                        |
| [R2R4]                                                     | <u>R1</u>                                                  | [R1R4]                                                     | <u>R2</u>                                                  | AB yes; CD yes                                                                   | AB yes; CD none                                                    | yes compatible              |
| [R2R6]                                                     | <u>R2</u>                                                  | [R1R2]                                                     | <u>R2</u>                                                  | AB yes; CD none                                                                  | AB yes; CD none                                                    | none                        |
| [R1R5]                                                     | <u>R3R5</u>                                                | [R3R5]                                                     | <u>R1R5</u>                                                | AB none; CD none                                                                 | AB yes; CD yes                                                     | none                        |
| [R2R3]                                                     | <u>R1R3</u>                                                | [R1R3]                                                     | <u>R2</u>                                                  | AB yes; CD none                                                                  | AB yes; CD none                                                    | yes compatible              |
| [R2R4]                                                     | <u>R6</u>                                                  | [R2R6]                                                     | <u>R2</u>                                                  | AB yes; CD none                                                                  | AB yes; CD yes                                                     | none                        |
| [R4R5]                                                     | <u>R1R5</u>                                                | [R1R5]                                                     | <u>R4R5</u>                                                | AB yes; CD yes                                                                   | AB yes; CD yes                                                     | none                        |
| [R4R5]                                                     | <u>R2R5</u>                                                | [R2R5]                                                     | <u>R4R5</u>                                                | AB yes; CD yes                                                                   | AB yes ; CD yes                                                    | none                        |

**Table S2.** Pairwise combinations of female (Line) x male (Column) leading to compatibility in one direction and incompatibility in the other direction of the cross (asymmetry). All pair should G1xG2 or G2xG1.

| <i>Genotype<sup>1</sup></i>     |           |               |           |             |           | <b>R5R6</b> |             |             |             |                  |              |
|---------------------------------|-----------|---------------|-----------|-------------|-----------|-------------|-------------|-------------|-------------|------------------|--------------|
| Pollen                          |           | R2R5          |           |             |           | R4R6        |             |             |             |                  |              |
| Pollen                          |           | R2R4          |           |             |           | R3R6        |             |             |             |                  |              |
| Pollen                          |           | R2R3          |           |             |           | R2R6        |             |             |             |                  |              |
| Pollen                          | R1R4      | R1R2          | R3R4      | <b>R4R4</b> | R4R5      | R1R6        | R1R3        | R1R5        | R3R5        |                  |              |
| <i>Phenotypes= determinants</i> | <u>R1</u> | <u>R2</u>     | <u>R3</u> | <u>R4</u>   | <u>R5</u> | <u>R6</u>   | <u>R1R3</u> | <u>R1R5</u> | <u>R3R5</u> | <u>Number of</u> | combinations |
| <i>Stigma</i>                   |           |               |           |             |           |             |             |             |             | symmetric        | asymmetric   |
| [R1R2]                          |           | R1R2          |           |             |           | R2R6        |             |             |             | 7                | 2            |
| [R1R3]                          |           | R1R2,<br>R2R3 |           |             |           | R1R6, R3R6  |             |             |             | 7                | 4            |
| [R1R4]                          |           | R1R2          |           |             |           | R1R6        |             |             |             | 7                | 2            |
| [R1R5]                          |           | R1R2,<br>R2R5 |           |             |           | <b>R5R6</b> |             |             |             | 7                | 4            |
| [R1R6]                          |           | R1R2          |           |             |           | R1R6        |             |             |             | 7                | 2            |
| [R2R2]                          |           |               |           |             |           | R2R6        |             |             |             | 8                | 1            |
| [R2R3]                          |           |               | R3R4      |             |           | R3R6        | R1R3        |             | R3R5        | 5                | 4            |
| [R2R4]                          |           |               |           |             |           | R2R6        |             |             |             | 8                | 1            |
| [R2R5]                          |           |               |           |             | R4R5      | R1R6, R5R6  |             | R1R5        | R3R5        | 5                | 5            |
| [R2R6]                          |           |               |           |             |           |             |             |             |             | 9                | 0            |
| [R3R3]                          |           | R2R3          |           |             |           | R3R6        |             |             |             | 7                | 2            |
| [R3R4]                          |           | R2R3          |           |             |           | R3R6        |             |             |             | 7                | 2            |
| [R3R5]                          |           | R2R5, R2R3    |           |             |           |             |             |             |             | 8                | 2            |
| [R3R6]                          |           |               | R3R4      |             |           |             |             |             |             | 8                | 1            |
| [R4R4]                          | R1R4      | R2R4          | R3R4      |             | R4R5      | R4R6        |             |             |             | 4                | 5            |
| [R4R5]                          |           | R2R5          |           |             |           | R5R6        |             |             |             | 7                | 2            |
| [R4R6]                          |           |               |           |             |           |             |             |             |             | 9                | 0            |
| [R5R5]                          |           | R2R5          |           |             |           | <b>R5R6</b> |             |             |             | 7                | 2            |
| [R5R6]                          |           |               |           |             | R4R5      |             |             | R1R5        | R3R5        | 6                | 3            |
|                                 |           |               |           |             |           |             |             |             |             | 140              | 46           |

<sup>1</sup> PASI in stigma [R1] = [R2] = [R3] = [R4] = [R5] = [R6] and in pollen R6 > R2, > R1 = R3 = R5 > R4

**Table S3.** This is a table. S -allelepairs leading to inconsistencies between literature, DSI and PASI after paternity tests revealing a pollen class that may suffer degradation of S determinants (DSD) causing paradoxical diagnosis to identify pollinizers

| Stigma<br>G1 or G2 | Father<br>G2 or G1                                                                                            | Diagnosis in<br>literature | After DSI         | After PASI | DSD<br>may | Final Paternity test<br>diagnosis<br>accepted/rejected |
|--------------------|---------------------------------------------------------------------------------------------------------------|----------------------------|-------------------|------------|------------|--------------------------------------------------------|
| R1R2               | <u>R1, R1R3,R1R5</u><br><u>R1, R3, R1R3,</u><br><u>R1R4, R1R5,</u><br><u>R1R6, R3R4,</u><br><u>R3R5, R3R6</u> | Pollinizer                 | <u>Pollinizer</u> | Rejected   | yes        | rejected                                               |
| R1R3               | <u>R1, R1R3,R1R5</u>                                                                                          | Pollinizer                 | <u>Pollinizer</u> | Reject     | yes        | rejected                                               |
| R1R4               | <u>R1, R2, R1R5,</u><br><u>R3R5</u>                                                                           | Pollinizer                 | <u>Pollinizer</u> | Reject     | yes        | rejected                                               |
| R1R5               | <u>R1, R1R3, R1R5,</u><br><u>R6</u>                                                                           | Pollinizer                 | <u>Pollinizer</u> | Reject     | yes        | rejected                                               |
| R1R6               | <u>R2,</u><br><u>R3,R1R3,R3R5</u>                                                                             | Pollinizer                 | <u>Pollinizer</u> | Reject     | yes        | rejected                                               |
| R2R3               | <u>R2</u>                                                                                                     | Pollinizer                 | <u>Pollinizer</u> | Reject     | yes        | rejected                                               |
| R2R4               | <u>R2,R1R5, R3R5</u>                                                                                          | Pollinizer                 | <u>Pollinizer</u> | Reject     | yes        | rejected                                               |
| R2R5               | <u>R2, R6</u>                                                                                                 | Pollinizer                 | <u>Pollinizer</u> | Reject     | yes        | rejected                                               |
| R2R6               | <u>R3, R1R3,R3R5</u>                                                                                          | Pollinizer                 | <u>Pollinizer</u> | Reject     | yes        | rejected                                               |
| R3R4               | <u>R3,R5, R1R3,</u><br><u>R3R5, R3 R5</u>                                                                     | Pollinizer                 | <u>Pollinizer</u> | Reject     | yes        | rejected                                               |
| R3R5               | <u>R3, R1R3, R3R5,</u><br><u>R6</u>                                                                           | Pollinizer                 | <u>Pollinizer</u> | Reject     | yes        | rejected                                               |
| R3R6               | <u>R5</u>                                                                                                     | Pollinizer                 | <u>Pollinizer</u> | Reject     | yes        | rejected                                               |
| R4R5               | <u>R6</u>                                                                                                     | Pollinizer                 | <u>Pollinizer</u> | Reject     | yes        | rejected                                               |
| R4R6               | <u>R5, R1R5, R3R5,</u><br><u>R6</u>                                                                           | Pollinizer                 | <u>Pollinizer</u> | Reject     | yes        | rejected                                               |
| R5R6               |                                                                                                               | Pollinizer                 | <u>Pollinizer</u> | Reject     | yes        | rejected                                               |
